# Supplementary material for: Aggression and discrimination among closely versus distantly related species of Drosophila
Source: R Soc Open Sci. 2019 Jun 12;6(6):190069. doi: 10.1098/rsos.190069 (PMC6599796; doi:10.1098/rsos.190069)
Supplement: Raw Data of Aggression Scoring [file rsos190069supp8.xlsx]

## Sheet: Description of data
This file includes the raw data for the manuscript "Aggression and discrimination among closely versus distantly related species of Drosophila" by Gupta et al. Below the data columns are described. The accompanying data are on the next spreadsheet.
Column name	Description
file_name	Ordinal names of video files.
date_recorded	Date that aggression trial was recorded.
scored_by	Researcher who scored aggression.
camera_side	Two trials were recorded in parallel in adjacent wells of a 12-well plate. Camera side refers to the side on which the trial was run, relative to the other parallel trial.
Sp1_White	Name of the species that was painted white.
Sp2_Blue	Name of the species that was painted blue.
Sp1_num_males	Number of males of species 1.
Sp1_color	Color that species 1 was painted.
Sp1_age	Age of males of species 1.
Sp1_starvation_hrs	Number of hours males were starved prior to the trial for species 1.
Sp2_num_males	Number of males of species 2.
Sp2_color	Color that species 2 was painted.
Sp2_age	Age of males of species 2.
Sp2_starvation_hrs	Number of hours males were starved prior to the trial for species 2.
Introduced_at	Time of day that males were introduced to the aggression arena and the trial began.
First_Consp_lunge	Time of day when the first conspecific lunge was observed.
First_Intersp_lunge	Time of day when the first heterospecific lunge was observed.
Consp_latency_time	Latency to first conspecific lunge in minutes:seconds.
Intersp_latency_time	Latency to first heterospecific lunge in minutes:seconds.
Consp_latency_sec	Latency to first conspecific lunge in seconds.
Intersp_latency_sec	Latency to first heterospecific lunge in seconds.
num_lunges_W_on_W	Number of conspecific lunges observed for species 1.
num_lunges_B_on_B	Number of conspecific lunges observed for species 2.
num_lunges_W_on_B	Number of heterospecific lunges observed for species 1.
num_lunges_B_on_W	Number of heterospecific lunges observed for species 2.

## Sheet: Data
file_name	date_recorded	scored_by	camera_side	Sp1_White	Sp2_Blue	Sp1_num_males	Sp1_color	Sp1_age	Sp1_starvation_hrs	Sp2_num_males	Sp2_color	Sp2_age	Sp2_starvation_hrs	Introduced_at	First_Consp_lunge	First_Intersp_lunge	Consp_latency_time	Intersp_latency_time	Consp_latency_sec	Intersp_latency_sec	num_lunges_W_on_W	num_lunges_B_on_B	num_lunges_W_on_B	num_lunges_B_on_W
9	2012-06-29	ND	R	mel	sim	2	White	5	15.5	2	Blue	5	15.5	2012-07-29 11:00:38	2012-07-29 11:03:36	2012-07-29 11:06:44	00:02:58	00:06:06	178	366	0	19	1	17
10	2012-06-29	ND	L	mel	sim	2	White	5	15.5	2	Blue	5	15.5	2012-07-29 11:00:38	2012-07-29 11:25:34	2012-07-29 11:20:37	00:24:56	00:19:59	1496	1199	0	52	1	17
5	2012-07-22	ND	L	mel	sim	2	White	5	15.5	2	Blue	5	15.5	2012-07-29 10:54:43	2012-07-29 10:59:58	2012-07-29 11:01:10	00:05:15	00:06:27	316	387	13	27	20	91
1	2012-06-13	TG	L	mel	sim	2	White	6	15.5	2	Blue	6	15.5	2012-07-29 10:44:01	2012-07-29 11:07:41		00:23:40		1420		4	12	7	21
2	2012-06-13	TG	R	mel	sim	2	White	6	15.5	2	Blue	6	15.5	2012-07-29 10:44:01		2012-07-29 11:05:32		00:21:31		1292	0	10	0	14
12	2012-08-01	ND	R	mel	sim	2	White	4	15.5	2	Blue	4	15.5	11:08:00	11:19:04	11:15:12	00:11:04	00:07:12	664	431	24	0	115	0
17	2012-08-04	TG	R	mel	sim	2	White	5	15.5	2	Blue	5	15.5	11:26:32	11:34:41	11:34:04	00:08:09	00:07:32	489	452	18	5	33	16
21	2012-08-10	RS	L	mel	sim	2	White	5	15.5	2	Blue	5	15.5	11:24:26	12:00:08	11:47:26	00:35:42	00:23:00	2142	1380	9	1	1	1
22	2012-08-10	TG	R	mel	sim	2	White	5	15.5	2	Blue	5	15.5	11:24:26	11:57:23	11:40:57	00:32:57	00:16:31	1977	991	1	0	0	1
27	2012-08-17	TG	R	mel	sim	2	White	5	15.5	2	Blue	5	15.5	11:02:26	11:25:17	11:33:40	00:22:51	00:31:14	1371	1874	6	0	48	13
28	2012-08-18	TG	L	mel	sim	2	White	5	15.5	2	Blue	5	15.5	11:15:56	11:20:48	11:24:11	00:04:52	00:08:15	292	495	31	11	21	34
29	2012-08-18	TG	R	mel	sim	2	White	5	15.5	2	Blue	5	15.5	11:15:56	11:24:46	11:21:33	00:08:50	00:05:37	530	337	2	16	32	12
33	2012-08-22	TG	R	mel	sim	2	White	5	15.5	2	Blue	5	15.5	11:17:03	11:36:01	11:34:00	00:18:58	00:16:57	1138	1017	10	48	45	30
34	2012-08-24	TG	C	mel	sim	2	White	5	15.5	2	Blue	5	15.5	12:04:55	12:10:49	21:25:03	00:05:54	09:20:08	354	560	0	76	0	20
35	2012-08-24	TG	L	mel	sim	2	White	5	15.5	2	Blue	5	15.5	10:04:44	10:18:19	10:22:37	00:13:35	00:17:53	815	1073	1	164	367	117
49	2012-09-06	TG	L	mel	sim	2	White	7	15.5	2	Blue	7	15.5	00:00:00	01:00:00	01:00:00	01:00:00	01:00:00	3600	3600	0	0	0	0
50	2012-09-06	TG	R	mel	sim	2	White	7	15.5	2	Blue	7	15.5	00:00:00	01:00:00	00:08:00	01:00:00	00:08:00	3600	480	0	0	1	24
51	2012-09-06	TG	L	mel	sim	2	White	7	15.5	2	Blue	7	15.5	12:04:01	12:30:47	12:30:29	00:26:46	00:26:28	1606	1588	0	170	3	39
52	2012-09-06	TG	R	mel	sim	2	White	7	15.5	2	Blue	7	15.5	12:04:01	12:36:07	12:09:25	00:32:06	00:05:24	1926	324	2	0	16	62
53	2012-08-11	TG	L	mel	sim	2	White	5	15.5	2	Blue	5	15.5	11:29:11	11:35:27	11:37:00	00:06:16	00:07:49	376	469	27	30	9	9
54	2012-08-11	TG	L	mel	sim	2	White	5	15.5	2	Blue	5	15.5	11:29:11	11:42:51	11:36:24	00:13:40	00:07:13	820	433	4	0	3	26
57	2012-09-14	TG	L	mel	sim	2	White	5	15.5	2	Blue	5	15.5	11:48:50	12:00:10	12:06:41	00:11:20	00:17:51	680	1071	3	19	4	72
36	2012-08-24	TG	R	mel	sim	2	White	5	15.5	2	Blue	5	15.5	10:04:44	10:26:32	10:18:16	00:21:48	00:13:32	1308	812	7	0	39	42
37	2012-08-27	MZ	R	mel	sim	2	White	5	15.5	2	Blue	5	15.5	11:30:44	11:32:50	11:37:43	00:02:06	00:06:59	126	419	5	5	120	18
39	2012-08-29	MZ	R	mel	sim	2	White	5	15.5	2	Blue	5	15.5	11:44:07	12:05:07	11:54:57	00:21:00	00:10:50	1260	650	0	72	0	25
43	2012-08-31	MZ	L	mel	sim	2	White	5	15.5	2	Blue	5	15.5	11:07:51	11:20:10	11:12:30	00:12:19	00:04:39	739	279	1	94	0	34
47	2012-09-01	MZ	L	mel	sim	2	White	5	15.5	2	Blue	5	15.5	10:54:35	11:08:36	11:02:56	00:14:01	00:08:21	841	501	39	0	206	2
48	2012-09-01	MZ	R	mel	sim	2	White	5	15.5	2	Blue	5	15.5	10:54:35	11:15:03	11:12:55	00:20:28	00:18:20	1228	1100	16	0	274	4
170	2013-02-02	TG	L	pse	per	2	White	5	15.5	2	Blue	5	15.5	10:45:26	11:45:26	11:21:07	01:00:00	00:35:41	3600	2141	0	0	12	0
171	2013-02-02	TG	R	pse	per	2	White	5	15.5	2	Blue	5	15.5	10:45:26	11:56:30	11:27:26	01:11:04	00:42:00	3600	2520	4	0	18	5
172	2013-02-06	TG	L	pse	per	2	White	5	15.5	2	Blue	5	15.5	10:45:50	10:48:26	10:59:30	00:02:36	00:13:40	156	820	15	0	11	0
173	2013-02-06	TG	R	pse	per	2	White	5	15.5	2	Blue	5	15.5	10:45:50	11:45:50	11:45:50	01:00:00	01:00:00	3600	3600	0	0	0	0
174	2013-02-06	TG	L	pse	per	2	White	5	15.5	2	Blue	5	15.5	10:49:08	10:55:06	11:49:08	00:05:58	01:00:00	358	3600	24	0	0	0
224	2013-03-26	TG	R	pse	per	2	White	5	15.5	2	Blue	5	15.5	12:18:54	12:26:21	12:37:29	00:07:27	00:18:35	447	1115	0	26	0	1
225	2013-03-26	TG	L	pse	per	2	White	5	15.5	2	Blue	5	15.5	12:15:08	12:28:06	12:23:31	00:12:58	00:08:23	778	503	0	4	0	24
226	2013-03-26	TG	R	pse	per	2	White	5	15.5	2	Blue	5	15.5	12:15:08	13:15:08	12:23:50	01:00:00	00:08:42	3600	522	0	0	1	3
227	2013-03-27	TG	L	pse	per	2	White	5	15.5	2	Blue	5	15.5	12:17:16	12:55:23	13:03:16	00:38:07	00:46:00	2287	2760	0	2	0	1
228	2013-03-27	TG	R	pse	per	2	White	5	15.5	2	Blue	5	15.5	12:17:16	12:28:19	12:24:12	00:11:03	00:06:56	1323	416	0	20	0	55
229	2013-03-27	MZ	L	pse	per	2	White	5	15.5	2	Blue	5	15.5	12:21:46	12:41:56	12:36:25	00:20:10	00:14:39	1210	879	0	15	0	32
230	2013-03-27	MZ	R	pse	per	2	White	5	15.5	2	Blue	5	15.5	12:21:46	12:24:55	12:32:05	00:03:09	00:10:19	189	619	1	19	0	30
233	2013-03-28	MZ	L	pse	per	2	White	5	15.5	2	Blue	5	15.5	12:19:47	13:19:47	12:38:44	01:00:00	00:18:57	3600	1137	0	0	7	0
234	2013-03-28	MZ	R	pse	per	2	White	5	15.5	2	Blue	5	15.5	12:19:47	12:30:43	12:22:31	00:10:56	00:02:44	656	164	10	0	6	9
251	2013-04-22	MZ	C	pse	per	2	White	5	15.5	2	Blue	5	15.5	21:08:16	21:09:16	21:10:05	00:01:00	00:01:49	60	109	1	2	70	10
261	2013-04-25	SH	L	pse	per	2	White	5	15.5	2	Blue	5	15.5	21:06:14	21:33:00	21:11:37	00:26:46	00:05:23	1606	323	2	0	9	0
262	2013-04-25	SH	R	pse	per	2	White	5	15.5	2	Blue	5	15.5	21:06:14	22:06:14	21:14:12	01:00:00	00:07:58	3600	478	0	0	1	0
265	2013-04-24	MZ	L	pse	per	2	White	5	15.5	2	Blue	5	15.5	21:10:05	21:13:51	21:21:15	00:03:46	00:11:10	226	670	4	0	32	0
266	2013-04-24	MZ	R	pse	per	2	White	5	15.5	2	Blue	5	15.5	21:10:05	21:13:27	21:15:05	00:03:22	00:05:00	202	300	14	7	30	9
269	2013-04-27	SH	L	pse	per	2	White	5	15.5	2	Blue	5	15.5	21:09:29	21:22:52	21:10:41	00:13:23	00:01:12	803	72	8	0	25	0
270	2013-04-27	SH	R	pse	per	2	White	5	15.5	2	Blue	5	15.5	21:09:29	21:24:29	21:12:32	00:15:00	00:03:03	900	183	9	0	11	0
271	2013-04-28	SH	C	pse	per	2	White	5	15.5	2	Blue	5	15.5	09:03:04	09:05:12	09:07:59	00:02:08	00:04:55	128	295	7	0	6	10
272	2013-04-27	SH	C	pse	per	2	White	5	15.5	2	Blue	5	15.5	21:10:14	22:10:14	21:15:58	01:00:00	00:05:44	3600	344	0	0	39	0
275	2013-04-29	SH	C	pse	per	2	White	5	15.5	2	Blue	5	15.5	21:08:04	21:27:49	22:08:04	00:19:45	01:00:00	1185	3600	4	0	0	0
276	2013-04-29	MZ	L	pse	per	2	White	5	15.5	2	Blue	5	15.5	21:07:25	22:07:25	22:07:25	01:00:00	01:00:00	3600	3600	0	0	0	0
277	2013-04-29	MZ	R	pse	per	2	White	5	15.5	2	Blue	5	15.5	21:07:25	21:14:32	21:12:33	00:07:07	00:05:08	427	308	2	0	7	0
282	2013-05-03	SH	C	pse	per	2	White	5	15.5	2	Blue	5	15.5	21:06:15	21:12:00	21:11:37	00:05:45	00:05:22	345	322	23	0	59	0
285	2013-05-03	SH	C	pse	per	2	White	5	15.5	2	Blue	5	15.5	21:08:04	21:15:50	21:10:52	00:07:46	00:02:48	466	168	4	1	30	1
94	2012-10-31	MZ	check	ana	sim	2	White	5	15.5	2	Blue	5	15.5	10:04:44	10:53:20	10:55:46	00:48:36	00:51:02	2916	3062	36	0	4	0
97	2012-10-31	MZ	check	ana	sim	2	White	5	15.5	2	Blue	5	15.5	09:59:01	10:31:38	10:59:01	00:32:37	01:00:00	1957	3600	110	0	0	0
100	2012-11-03	TG	R	ana	sim	2	White	5	15.5	2	Blue	5	15.5	09:51:03	09:54:25	09:59:01	00:03:22	00:07:58	202	478	87	53	2	0
111	2012-11-14	TG	L	ana	sim	2	White	5	15.5	2	Blue	5	15.5	10:45:04	10:49:57	11:02:09	00:04:53	00:17:05	293	1025	84	89	0	9
112	2012-11-14	TG	R	ana	sim	2	White	5	15.5	2	Blue	5	15.5	10:45:04	10:55:35	11:01:06	00:10:31	00:16:02	631	962	0	93	0	8
109	2012-11-14	TG	L	ana	sim	2	White	5	15.5	2	Blue	5	15.5	10:49:46	10:51:46	10:59:32	00:02:00	00:09:46	120	586	58	62	0	2
110	2012-11-14	TG	R	ana	sim	2	White	5	15.5	2	Blue	5	15.5	10:49:46	11:16:22	11:17:24	00:26:36	00:27:38	1596	1658	6	70	0	13
114	2012-11-15	MZ	R	ana	sim	2	White	5	15.5	2	Blue	5	15.5	10:44:04	10:56:48	10:48:56	00:12:44	00:04:52	764	292	7	88	6	3
120	2012-11-21	MZ	L	ana	sim	2	White	5	15.5	2	Blue	5	15.5	12:46:27	12:56:53	13:00:11	00:10:26	00:13:44	626	824	6	62	1	6
121	2012-11-21	MZ	R	ana	sim	2	White	5	15.5	2	Blue	5	15.5	12:46:27	12:51:18	12:53:02	00:04:51	00:06:35	291	395	53	91	2	1
122	2012-11-21	MZ	L	ana	sim	2	White	5	15.5	2	Blue	5	15.5	11:06:20	11:21:51	11:13:00	00:15:31	00:06:40	931	400	51	16	2	0
71	2012-09-29	TG	L	mel	ana	2	White	5	15.5	2	Blue	5	15.5	11:41:40	11:49:40	11:50:41	00:08:00	00:09:01	480	541	20	25	1	4
72	2012-09-29	TG	R	mel	ana	2	White	5	15.5	2	Blue	5	15.5	11:41:40	12:41:40	12:41:40	01:00:00	01:00:00	3600	3600	0	0	0	0
73			C	mel	ana	2	White	5	15.5	2	Blue	5	15.5	11:45:05	12:13:58	12:45:05	00:28:53	01:00:00	1733	3600	5	0	0	0
76	2012-10-05	TG	L	mel	ana	2	White	5	15.5	2	Blue	5	15.5	11:29:10	11:30:08	11:53:01	00:00:58	00:23:51	58	1431	0	46	0	3
77	2012-10-05	TG	R	mel	ana	2	White	5	15.5	2	Blue	5	15.5	11:29:10	11:49:51	12:29:10	00:20:41	01:00:00	175	3600	0	122	0	0
74	2012-10-05	TG	L	mel	ana	2	White	5	15.5	2	Blue	5	15.5	11:33:04	11:33:59	11:41:55	00:00:55	00:08:51	55	531	0	139	0	5
75	2012-10-05	TG	R	mel	ana	2	White	5	15.5	2	Blue	5	15.5	11:33:04	11:39:10	11:39:27	00:06:06	00:06:23	366	383	0	60	0	4
85	2012-10-17	TG	L	mel	ana	2	White	5	15.5	2	Blue	5	15.5	10:30:27	10:32:41	10:48:49	00:02:14	00:18:22	134	1102	0	34	0	2
86	2012-10-17	TG	R	mel	ana	2	White	5	15.5	2	Blue	5	15.5	10:30:27	10:33:19	11:30:27	00:02:52	01:00:00	172	3600	0	18	0	0
87	2012-10-17	TG	L	mel	ana	2	White	5	15.5	2	Blue	5	15.5	10:26:52	10:56:44	10:56:49	00:29:52	00:29:57	1792	1797	66	0	4	0
88	2012-10-17	TG	R	mel	ana	2	White	5	15.5	2	Blue	5	15.5	10:26:52	10:33:04	10:40:24	00:06:12	00:13:32	372	812	0	43	0	8
139	2012-12-09	TG	L	mel	ana	2	White	5	15.5	2	Blue	5	15.5	11:10:09	11:17:40	11:18:33	00:07:31	00:08:24	451	504	33	7	0	1
140	2012-12-09	TG	R	mel	ana	2	White	5	15.5	2	Blue	5	15.5	11:10:09	11:36:51	12:00:06	00:26:42	00:49:57	1602	2997	31	2	6	0
141	2012-12-09	TG	C	mel	ana	2	White	5	15.5	2	Blue	5	15.5	11:12:10	11:15:51	12:12:10	00:03:41	01:00:00	221	3600	22	0	0	0
96	2012-10-31	MZ	L	ana	pal	2	White	5	15.5	2	Blue	5	15.5	09:59:01	10:10:56	10:07:54	00:11:55	00:08:53	715	533	0	44	0	45
103	2012-11-07	TG	R	ana	pal	2	White	5	15.5	2	Blue	5	15.5	10:55:43	11:09:15	11:07:02	00:13:32	00:11:19	812	679	2	14	0	35
102	2012-11-07	TG	L	ana	pal	2	White	5	15.5	2	Blue	5	15.5	10:55:43	11:55:43	11:12:51	01:00:00	00:17:08	3600	1028	0	0	33	0
115	2012-11-17	TG	L	ana	pal	2	White	5	15.5	2	Blue	5	15.5	10:47:24	11:09:05	11:47:24	00:21:41	01:00:00	1301	3600	0	4	0	0
116	2012-11-17	TG	R	ana	pal	2	White	5	15.5	2	Blue	5	15.5	10:47:24	11:04:22	11:06:53	00:16:58	00:19:29	1018	1169	115	0	114	0
117	2012-11-17	TG	L	ana	pal	2	White	5	15.5	2	Blue	5	15.5	10:51:37	11:07:17	11:04:56	00:15:40	00:13:19	940	799	63	1	61	0
118	2012-11-21	TG	L	ana	pal	2	White	5	15.5	2	Blue	5	15.5	11:02:17	11:25:12	11:17:33	00:22:55	00:15:16	1375	916	6	4	19	0
126	2012-11-29	TG	L	ana	pal	2	White	5	15.5	2	Blue	5	15.5	11:04:26	11:42:06	11:17:21	00:37:40	00:12:55	2260	775	19	0	24	0
127	2012-12-02	TG	L	ana	pal	2	White	5	15.5	2	Blue	5	15.5	11:47:12	11:54:09	11:52:31	00:06:57	00:05:19	417	319	21	0	27	13
128	2012-12-02	TG	R	ana	pal	2	White	5	15.5	2	Blue	5	15.5	11:47:12	11:58:33	12:47:12	00:11:21	01:00:00	681	3600	5	0	0	0
129	2012-12-02	TG	L	ana	pal	2	White	5	15.5	2	Blue	5	15.5	11:42:13	12:08:39	11:57:45	00:26:26	00:15:32	1586	932	38	0	46	0
130	2012-12-02	TG	R	ana	pal	2	White	5	15.5	2	Blue	5	15.5	11:42:13	12:42:13	12:42:13	01:00:00	01:00:00	3600	3600	0	0	0	0
138	2012-12-06	TG	R	ana	pal	2	White	5	15.5	2	Blue	5	15.5	10:54:09	11:49:11	11:54:09	00:55:02	01:00:00	3302	3600	0	0	7	0
178	2013-02-14	MZ	L	ana	atri	2	White	5	15.5	2	Blue	5	15.5	10:49:48	10:57:00	11:02:38	00:07:12	00:12:50	432	770	40	1	5	2
179	2013-02-14	SH	L	ana	atri	2	White	5	15.5	2	Blue	5	15.5	10:49:48	11:49:48	11:49:48	01:00:00	01:00:00	3600	3600	0	0	0	0
180	2013-02-14	MZ	L	ana	atri	2	White	5	15.5	2	Blue	5	15.5	10:54:52	11:45:01	11:45:57	00:50:09	00:51:05	3009	3065	30	0	9	1
186	2013-02-20	SH	L	ana	atri	2	White	5	15.5	2	Blue	5	15.5	10:47:57	10:54:27	10:53:44	00:06:30	00:05:47	390	347	4	190	0	62
189	2013-02-21	SH	L	ana	atri	2	White	5	15.5	2	Blue	5	15.5	10:49:14	11:23:49	11:49:14	00:34:35	01:00:00	2075	3600	3	0	0	0
190	2013-02-21	SH	L	ana	atri	2	White	5	15.5	2	Blue	5	15.5	10:49:14	10:58:50	11:00:26	00:09:36	00:11:12	576	672	22	16	1	1
191	2013-02-21	MZ	L	ana	atri	2	White	5	15.5	2	Blue	5	15.5	10:54:49	11:24:23	11:54:49	00:29:34	01:00:00	1774	3600	3	0	0	0
192	2013-02-21	MZ	R	ana	atri	2	White	5	15.5	2	Blue	5	15.5	10:54:49	11:01:13	11:54:49	00:06:24	01:00:00	384	3600	0	11	0	0
193	2013-02-22	MZ	L	ana	atri	2	White	5	15.5	2	Blue	5	15.5	10:50:17	10:57:29	11:06:17	00:07:12	00:16:00	432	960	83	69	35	10
201	2013-03-06	SH	L	ana	atri	2	White	5	15.5	2	Blue	5	15.5	12:51:03	13:01:39	12:55:47	00:10:36	00:04:44	636	284	1	185	0	82
202	2013-03-06	MZ	R	ana	atri	2	White	5	15.5	2	Blue	5	15.5	12:51:03	12:57:53	13:03:21	00:06:50	00:12:18	410	738	4	77	0	5
187	2013-02-20	SH	R	ana	atri	2	White	5	15.5	2	Blue	5	15.5	10:47:56	10:58:43	11:00:23	00:10:47	00:12:27	647	747	5	77	0	12
209	2013-03-15	MZ	L	ana	atri	2	White	5	15.5	2	Blue	5	15.5	09:53:13	10:17:04	10:17:01	00:23:51	00:23:48	1431	1428	0	116	0	76
237	2013-04-04	MZ	L	ana	atri	2	White	5	15.5	2	Blue	5	15.5	09:02:20	09:05:22	09:23:53	00:03:02	00:21:33	182	1293	0	48	0	8
238	2013-04-04	MZ	R	ana	atri	2	White	5	15.5	2	Blue	5	15.5	09:02:20	09:13:27	10:02:20	00:11:07	01:00:00	667	3600	32	0	0	0
264	2013-04-25	MZ	R	ana	atri	2	White	5	15.5	2	Blue	5	15.5	09:05:59	09:29:57	10:05:59	00:23:58	01:00:00	1438	3600	32	0	0	0
248	2013-04-19	SH	R	ana	atri	2	White	5	15.5	2	Blue	5	15.5	09:13:54	09:19:40	10:13:54	00:05:46	01:00:00	346	3600	10	2	0	0
263	2013-04-25	SH	L	ana	atri	2	White	5	15.5	2	Blue	5	15.5	09:05:49	09:29:09	09:29:20	00:23:20	00:23:31	1400	1411	23	0	1	0
247	2013-04-19	SH	L	ana	atri	2	White	5	15.5	2	Blue	5	15.5	09:13:54	10:13:54	09:25:29	01:00:00	00:11:35	3600	695	0	0	2	0
291	2013-05-08	SH	R	ana	atri	2	White	5	15.5	2	Blue	5	15.5	09:11:04	09:18:14	09:33:21	00:07:10	00:22:17	430	1337	74	0	1	0
